# Supplementary material for: Flexible Multimodal Synchrony during Joint Drumming Reflects Interaction Demands and Social Connection
Source: Research Square preprint supplement (doi:10.21203/rs.3.rs-6874510/v1), 2025-08-27
Supplement: Supplementary file 1 [file 78fb6ed2f53198d19c5d5890.xlsx]

## Sheet: Sheet1
Stage	Baseline 1	Beat Entertainment	Free Improvisation	Structured Improvisation	Baseline 2
Baseline 1	-
Beat Entertainment	0.07	-
Free Improvisation	-0.09	.31**	-
Structured Improvisation	.26*	.27**	.55***	-
Baseline 2	0.01	0.09	0.12	.24*	-
