# Supplementary material for: Flexible Multimodal Synchrony during Joint Drumming Reflects Interaction Demands and Social Connection
Source: Research Square preprint supplement (doi:10.21203/rs.3.rs-6874510/v1), 2025-08-27
Supplement: Supplementary file 2 [file 810a37030c18ffad3bcd53ba.xlsx]

## Sheet: Sheet1
Stage	Baseline 1	Beat Entertainment	Free Improvisation	Structured Improvisation	Baseline 2
Baseline 1	–
Beat Entertainment	.37***	–
Free Improvisation	–.07	0.19	–
Structured Improvisation	0.05	0.04	.44***	–
Baseline 2	–.14	0.03	.35***	0.01	–
