# Supplementary material for: Flexible Multimodal Synchrony during Joint Drumming Reflects Interaction Demands and Social Connection
Source: Research Square preprint supplement (doi:10.21203/rs.3.rs-6874510/v1), 2025-08-27
Supplement: Supplementary file 3 [file be3cabb7b19510a6a0781028.xlsx]

## Sheet: Sheet1
		Alpha
	Stage	Baseline 1	Beat Entertainment	Free Improvisation	Structured Improvisation	Baseline 2
Heart rate	Baseline 1	0.01	.25*	0.05	-0.11	0.11
	Beat Entertainment	0.05	0.09	-0.01	0.03	0.01
	Free Improvisation	-0.04	0.06	.42***	.51***	0.17
	Structured Improvisation	-0.07	0.01	0.12	.33***	-0.11
	Baseline 2	0.18	.24*	0.14	0.14	-0.18
